# Supplementary material for: Gating intermediates reveal inhibitory role of the voltage sensor in a cyclic nucleotide-modulated ion channel
Source: PubMed Central journal article supplement (PMC9663499; doi:10.1038/s41467-022-34673-z), 2022-11-14
Supplement: 41467_2022_34673_MOESM2_ESM.pdf [file 41467_2022_34673_MOESM2_ESM.pdf]

## Reporting Summary

Nature Portfolio wishes to improve the reproducibility of the work that we publish. This form provides structure for consistency and transparency in reporting. For further information on Nature Portfolio policies, see our [Editorial Policies](#) and the [Editorial Policy Checklist](#).

### Statistics

For all statistical analyses, confirm that the following items are present in the figure legend, table legend, main text, or Methods section.

- |                                     |                                                                                                                                                                                                                                                                                                |
|-------------------------------------|------------------------------------------------------------------------------------------------------------------------------------------------------------------------------------------------------------------------------------------------------------------------------------------------|
| n/a                                 | Confirmed                                                                                                                                                                                                                                                                                      |
| <input type="checkbox"/>            | <input checked="" type="checkbox"/> The exact sample size ( $n$ ) for each experimental group/condition, given as a discrete number and unit of measurement                                                                                                                                    |
| <input type="checkbox"/>            | <input checked="" type="checkbox"/> A statement on whether measurements were taken from distinct samples or whether the same sample was measured repeatedly                                                                                                                                    |
| <input checked="" type="checkbox"/> | <input type="checkbox"/> The statistical test(s) used AND whether they are one- or two-sided<br><i>Only common tests should be described solely by name; describe more complex techniques in the Methods section.</i>                                                                          |
| <input checked="" type="checkbox"/> | <input type="checkbox"/> A description of all covariates tested                                                                                                                                                                                                                                |
| <input checked="" type="checkbox"/> | <input type="checkbox"/> A description of any assumptions or corrections, such as tests of normality and adjustment for multiple comparisons                                                                                                                                                   |
| <input type="checkbox"/>            | <input checked="" type="checkbox"/> A full description of the statistical parameters including central tendency (e.g. means) or other basic estimates (e.g. regression coefficient) AND variation (e.g. standard deviation) or associated estimates of uncertainty (e.g. confidence intervals) |
| <input checked="" type="checkbox"/> | <input type="checkbox"/> For null hypothesis testing, the test statistic (e.g. $F$ , $t$ , $r$ ) with confidence intervals, effect sizes, degrees of freedom and $P$ value noted<br><i>Give <math>P</math> values as exact values whenever suitable.</i>                                       |
| <input checked="" type="checkbox"/> | <input type="checkbox"/> For Bayesian analysis, information on the choice of priors and Markov chain Monte Carlo settings                                                                                                                                                                      |
| <input checked="" type="checkbox"/> | <input type="checkbox"/> For hierarchical and complex designs, identification of the appropriate level for tests and full reporting of outcomes                                                                                                                                                |
| <input checked="" type="checkbox"/> | <input type="checkbox"/> Estimates of effect sizes (e.g. Cohen's $d$ , Pearson's $r$ ), indicating how they were calculated                                                                                                                                                                    |

*Our web collection on [statistics for biologists](#) contains articles on many of the points above.*

### Software and code

Policy information about [availability of computer code](#)

Data collection

single channel recordings: pClamp 10.7.0.3  
cryo EM data collection: Leginon 3, SerialEM 3  
smFRET data collection: SymPhoTime 64 version 2.4

Data analysis

single channel recordings: ClampFit 10.7.0.3 and Origin  
cryo EM data analysis: Relion 3.0.7 and 3.1, CTFIND 4.1, Chimera 1.15, ChimeraX 1.3, Phenix 1.18.2 and 1.19.2-4158, Coot 0.9.2-pre, Pymol 2.1, MolProbity4.4  
smFRET data analysis: Matlab R2018a, Origin Student 2018b

For manuscripts utilizing custom algorithms or software that are central to the research but not yet described in published literature, software must be made available to editors and reviewers. We strongly encourage code deposition in a community repository (e.g. GitHub). See the Nature Portfolio [guidelines for submitting code & software](#) for further information.

## Data

Policy information about [availability of data](#)

All manuscripts must include a [data availability statement](#). This statement should provide the following information, where applicable:

- Accession codes, unique identifiers, or web links for publicly available datasets
- A description of any restrictions on data availability
- For clinical datasets or third party data, please ensure that the statement adheres to our [policy](#)

Data supporting the findings of this manuscript are available from the corresponding author upon request. A reporting summary for this article is available as a Supplementary Information file. The maps for SthK in different states have been deposited in the Electron Microscopy Data Bank (EMDB) under accession codes (SthK Y26F closed state: 24670 [<https://www.ebi.ac.uk/emdb/EMD-24670>], SthK Y26F activated state: 24682 [<https://www.ebi.ac.uk/emdb/EMD-24682>], SthK R120A closed state: 24681 [<https://www.ebi.ac.uk/emdb/EMD-24681>], SthK R120A open state 1: 24692 [<https://www.ebi.ac.uk/emdb/EMD-24692>], SthK R120A open state 2: 24747 [<https://www.ebi.ac.uk/emdb/EMD-24747>], SthK R120A open state 3: 24746 [<https://www.ebi.ac.uk/emdb/EMD-24746>]). Atomic coordinates for all structures have been deposited in the Protein Data Bank (PDB) with accession codes 7RSH [<https://doi.org/10.2210/pdb7rsh/pdb>], 7RTJ [<https://doi.org/10.2210/pdb7rtj/pdb>], 7RTF [<https://doi.org/10.2210/pdb7rtf/pdb>], 7RU0 [<https://doi.org/10.2210/pdb7ru0/pdb>], 7RYS [<https://doi.org/10.2210/pdb7rys/pdb>], 7RYR [<https://doi.org/10.2210/pdb7ryr/pdb>], respectively. The model for WT SthK (PDB: 6CJU [<https://doi.org/10.2210/pdb6cju/pdb>]) and the corresponding cryo-EM density (EMDB: 7484 [<https://www.ebi.ac.uk/emdb/EMD-7484>]) were used for comparisons. The source data for all electrophysiology data are provided as a source data file.

## Human research participants

Policy information about [studies involving human research participants and Sex and Gender in Research](#).

|                             |                                  |
|-----------------------------|----------------------------------|
| Reporting on sex and gender | <input type="text" value="n/a"/> |
| Population characteristics  | <input type="text" value="n/a"/> |
| Recruitment                 | <input type="text" value="n/a"/> |
| Ethics oversight            | <input type="text" value="n/a"/> |

Note that full information on the approval of the study protocol must also be provided in the manuscript.

## Field-specific reporting

Please select the one below that is the best fit for your research. If you are not sure, read the appropriate sections before making your selection.

- Life sciences       Behavioural & social sciences       Ecological, evolutionary & environmental sciences

For a reference copy of the document with all sections, see [nature.com/documents/nr-reporting-summary-flat.pdf](https://www.nature.com/documents/nr-reporting-summary-flat.pdf)

## Life sciences study design

All studies must disclose on these points even when the disclosure is negative.

|                 |                                                                                                                                                      |
|-----------------|------------------------------------------------------------------------------------------------------------------------------------------------------|
| Sample size     | <input type="text" value="Predetermination of sample size is not applicable to our experiments since no statistical analysis is performed."/>        |
| Data exclusions | <input type="text" value="Recording artifacts were excluded."/>                                                                                      |
| Replication     | <input type="text" value="All functional experiments were repeated using independent samples."/>                                                     |
| Randomization   | <input type="text" value="Randomization is not applicable to our biophysical experiments since there is no control group."/>                         |
| Blinding        | <input type="text" value="Blinding is not applicable to our biophysical experiments since there are no control group or living subjects involved."/> |

## Reporting for specific materials, systems and methods

We require information from authors about some types of materials, experimental systems and methods used in many studies. Here, indicate whether each material, system or method listed is relevant to your study. If you are not sure if a list item applies to your research, read the appropriate section before selecting a response.

## Materials & experimental systems

| n/a                                 | Included in the study                                  |
|-------------------------------------|--------------------------------------------------------|
| <input checked="" type="checkbox"/> | <input type="checkbox"/> Antibodies                    |
| <input checked="" type="checkbox"/> | <input type="checkbox"/> Eukaryotic cell lines         |
| <input checked="" type="checkbox"/> | <input type="checkbox"/> Palaeontology and archaeology |
| <input checked="" type="checkbox"/> | <input type="checkbox"/> Animals and other organisms   |
| <input checked="" type="checkbox"/> | <input type="checkbox"/> Clinical data                 |
| <input checked="" type="checkbox"/> | <input type="checkbox"/> Dual use research of concern  |

## Methods

| n/a                                 | Included in the study                           |
|-------------------------------------|-------------------------------------------------|
| <input checked="" type="checkbox"/> | <input type="checkbox"/> ChIP-seq               |
| <input checked="" type="checkbox"/> | <input type="checkbox"/> Flow cytometry         |
| <input checked="" type="checkbox"/> | <input type="checkbox"/> MRI-based neuroimaging |
